# Supplementary material for: Modulation of miR-155-5p signalling via 5-ASA for the prevention of high microsatellite instability: an in vitro study using human epithelial cell lines
Source: PubMed Central journal article supplement (PMC11502576; doi:10.1007/s13105-024-01033-y), 2024-07-10
Supplement: 13105_2024_1033_MOESM1_ESM.pdf [file 13105_2024_1033_MOESM1_ESM.pdf]

LPS at the dose of 5µg/ml significantly elevated the expression of both MLH1 and MSH2 genes ( $2.5 \pm 0.9$ ,  $p=0.04$  and  $2.3 \pm 0.7$ ,  $p=0.04$ ; respectively) while reduced MSH6 gene expression ( $0.51 \pm 0.21$ ,  $p=0.04$ ) in CACO-2 cells.

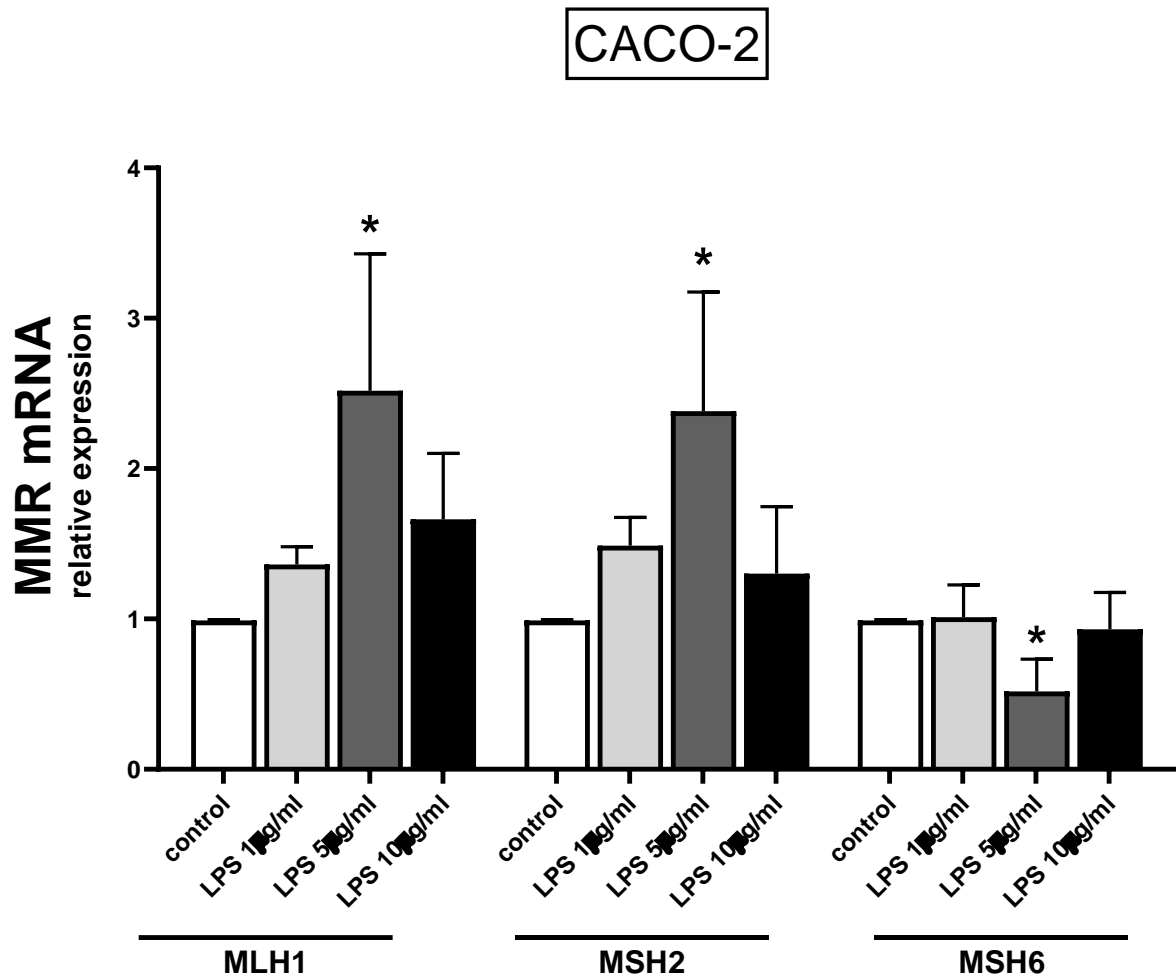

**Figure S1.** The expressions of MLH1, MSH2, and MSH6 in CACO-2 cells after treatment with different doses of LPS (1, 5, and 10µg/ml) were measured by quantitative PCR (real-time PCR). Levels of gene expression were normalised to the reference miR-16. Statistical analysis was performed using ANOVA or Mann-Whitney-test. Results are presented as mean  $\pm$  SEM ( $n=3$ );  $*p<0.05$  vs. controls.

The analysis of relative expression of MMR genes in tumorigenic cells CACO-2 showed no differences.

a

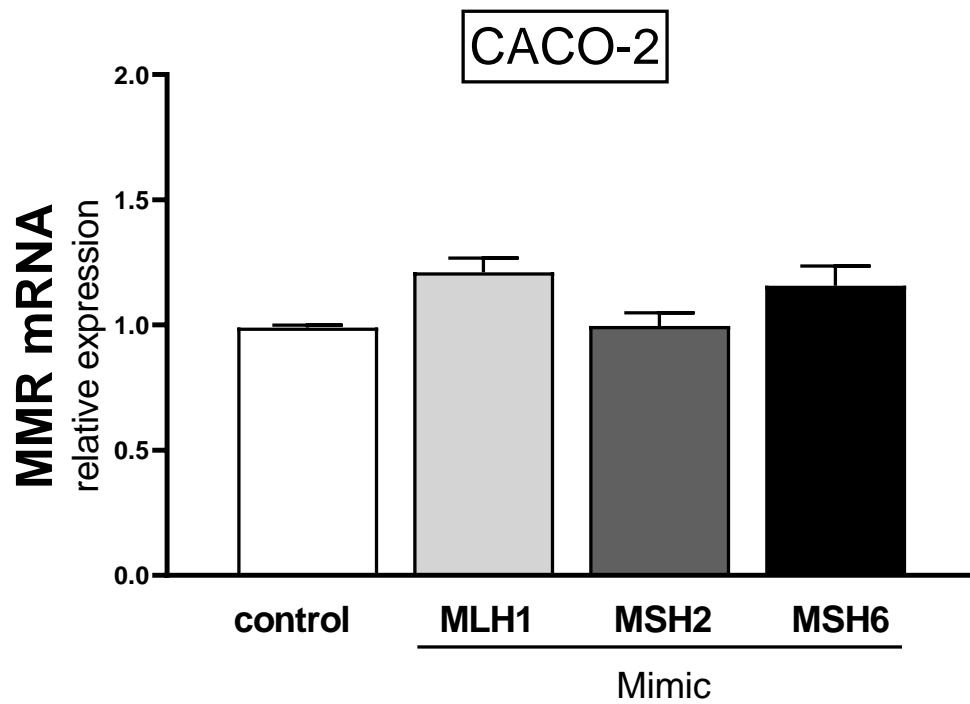

**Figure S2.** Induction of miR-155 by miR-155Mimic did not affect MMR genes expression mRNA level in CACO-2. Data are present as mean  $\pm$  SEM. Levels of gene expression were normalised to the reference miR-16. Statistical analysis was performed using ANOVA or Mann-Whitney-test. Mimic (miR-155Mimic).

The relative expression of miR-155 in tumorigenic cells: HT-29 and CACO-2. The results uncovered no significant difference in MMR mRNA level. Notably, 5-ASA, which initially reduced the expression of miR-155 in the NCM460D and HT-29 cell, did not affect MMR genes at mRNA level.

a

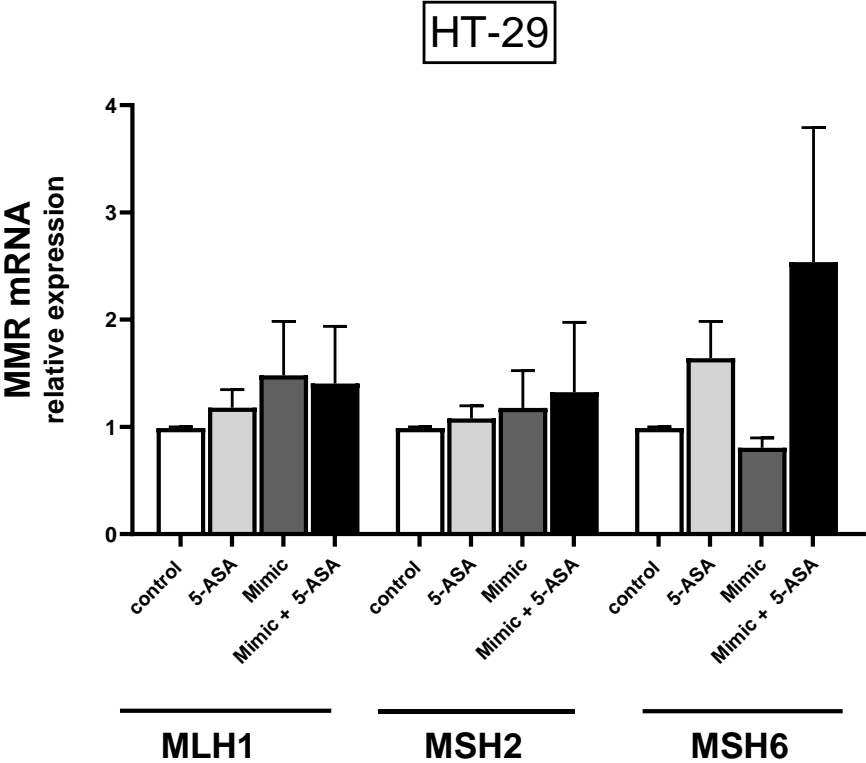

b

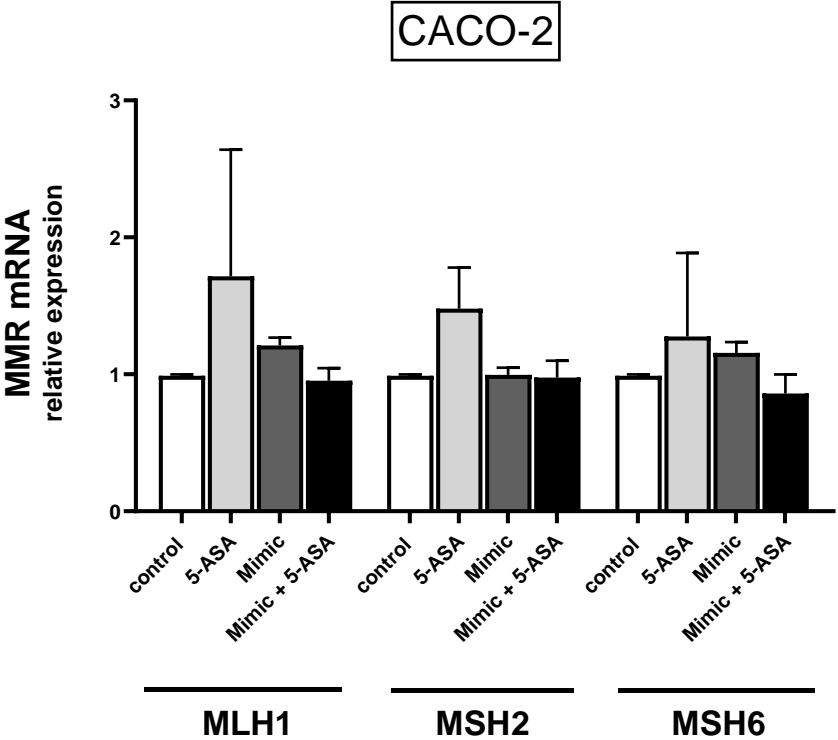

**Figure S3.** The MMR genes (MLH1, MSH2, MSH6) relative expression after 5-ASA with or without miR-155Mimic in HT-29 (a) or CACO-2 (b). Levels of gene expression were normalised to the reference miR-16. Statistical analysis was performed using ANOVA or Mann-Whitney-test. Results are presented as mean  $\pm$  SEM. Mimic (miR-155Mimic).
